# Supplementary material for: IL-17 Facilitates VCAM-1 Production and Monocyte Adhesion in Osteoarthritis Synovial Fibroblasts by Suppressing miR-5701 Synthesis
Source: MDPI journal article supplement (doi:10.3390/ijms23126804), 2022-06-18
Supplement: s1 [file s1]

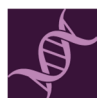

## Supplementary data

**Table S1.** Primer sequences used in this study.

| Primers         | Sequences (5'→3')         |
|-----------------|---------------------------|
| VCAM-1 (F)      | TTTGACAGGCTGGAGATAGACT    |
| VCAM-1 (R)      | TCAATGTGTAATTTAGCTCGGCA   |
| GAPDH (F)       | ACCACAGTCCATGCCATCAC      |
| GAPDH (R)       | TCCACCACCCTGTTGCTGTA      |
| hsa-let-7a-3p   | CTATACAATCTACTGTCTTTC     |
| hsa-let-7b-3p   | CTATACAACCTACTGCCTTCCC    |
| hsa-let-7f-1-3p | CTATACAATCTATTGCCTTCCC    |
| hsa-let-7f-2-3p | CTATACAGTCTACTGTCTTTCC    |
| hsa-miR-506-5p  | TATTCAGGAAGGTGTTACTTAA    |
| hsa-miR-561-5p  | ATCAAGGATCTTAACTTTGCC     |
| hsa-miR-586     | TATGCATTGTATTTTATAGGTCC   |
| hsa-miR-1284    | TCTATACAGACCCTGGCTTTTC    |
| hsa-miR-3163    | TATAAAATGAGGGCAGTAAGAC    |
| hsa-miR-4282    | TAAAATTTGCATCCAGGA        |
| hsa-miR-4514    | ACAGGCAGGATTGGGGAA        |
| hsa-miR-4692    | TCAGGCAGTGTGGGTATCAGAT    |
| hsa-miR-4766-5p | TCTGAAAGAGCAGTTGGTGTT     |
| hsa-miR-4775    | TTAATTTTTTGTTCGGTCACT     |
| hsa-miR-5580-5p | TGCTGGCTCATTTTCATATGTGT   |
| hsa-miR-5681a   | AGAAAGGGTGGCAATACCTCTT    |
| hsa-miR-5688    | TAACAAACACCTGTAAACAGC     |
| hsa-miR-5701    | TTATTGTCACGTTCTGATT       |
| U6 (F)          | GCTTCGGCAGCACATATACTAAAAT |
| U6 (R)          | CGCTTCACGAATTTGCGTGTCAT   |

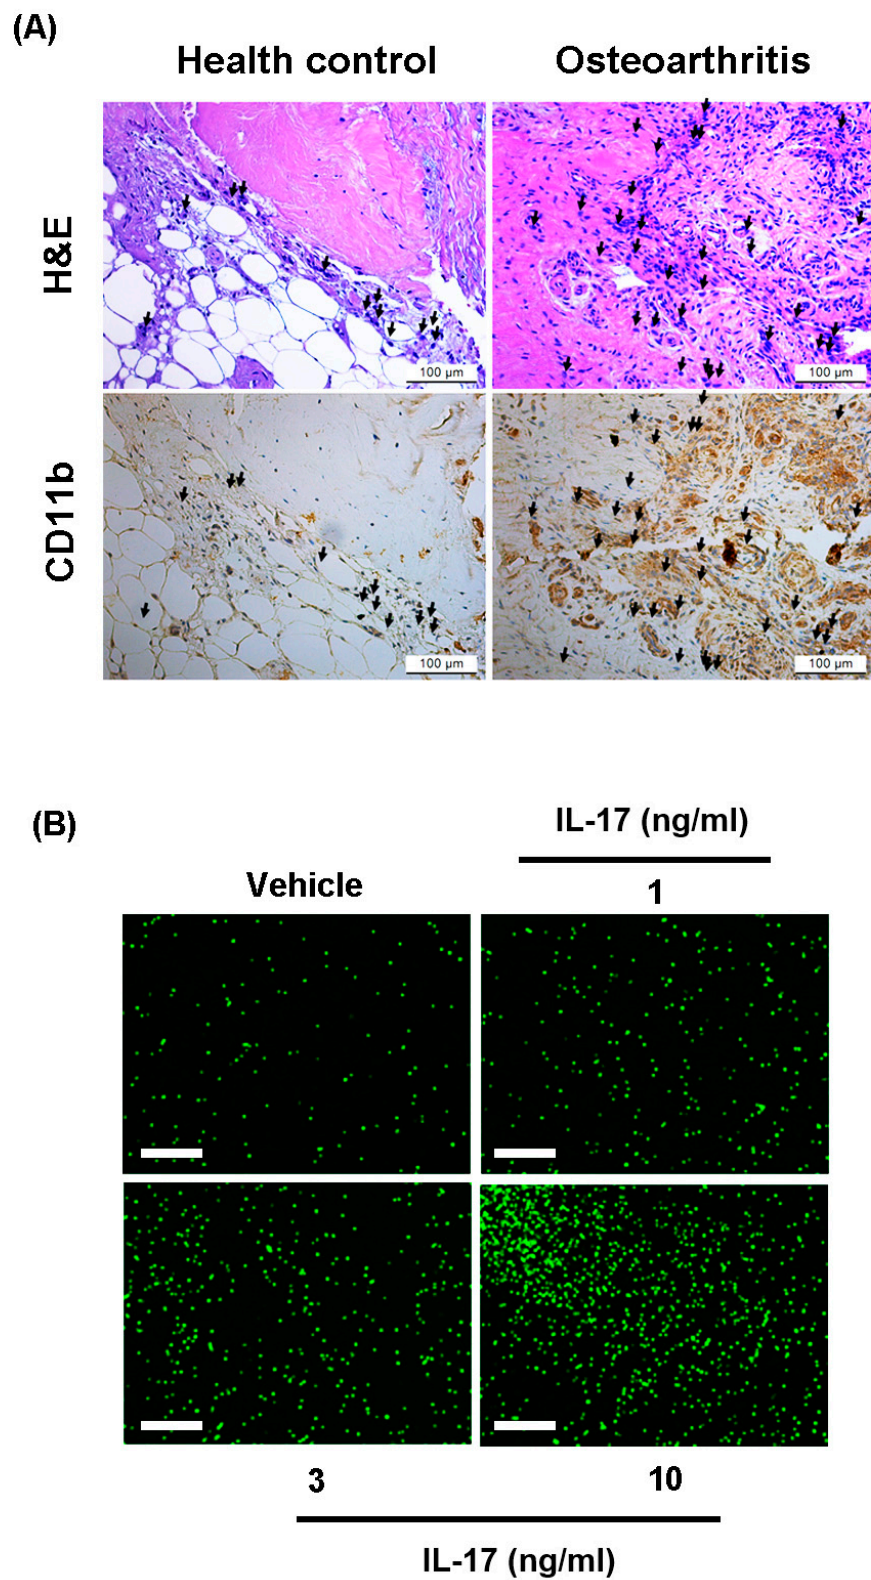

**Figure S1.** IL-17 promotes monocyte adhesion in OASFs. (A) IHC staining for CD11b in synovium samples from OA patients and healthy individuals. (B) OASFs were stimulated with vehicle or IL-17 (1–10 ng/mL) for 24 h. Monocytes (THP-1 cells) were then applied to the OASFs. Adherent THP-1 cells were photo-graphed and quantified under fluorescence microscopy. IHC size bar = 100  $\mu$ m. Adhesion size bar = 320  $\mu$ m.

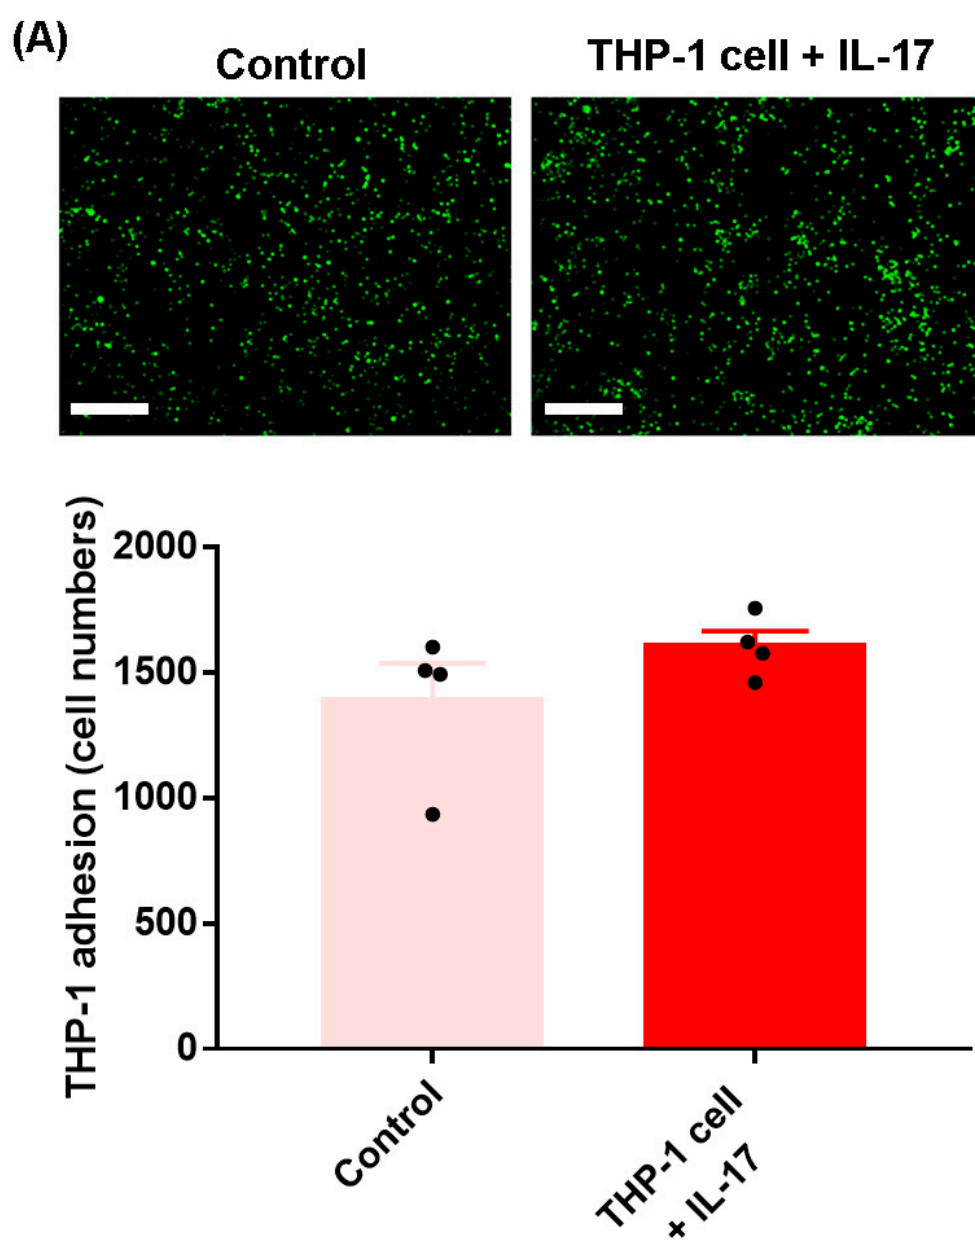

**Figure S2.** Stimulation of monocyte with IL-17 did not increase their adherence to OASFs. THP-1 cells were treated with IL-17 for 1 h then added to a monolayer of OASFs. Adherent THP-1 cells were photographed and quantified under fluorescence microscopy. Adhesion size bar = 320  $\mu$ m.

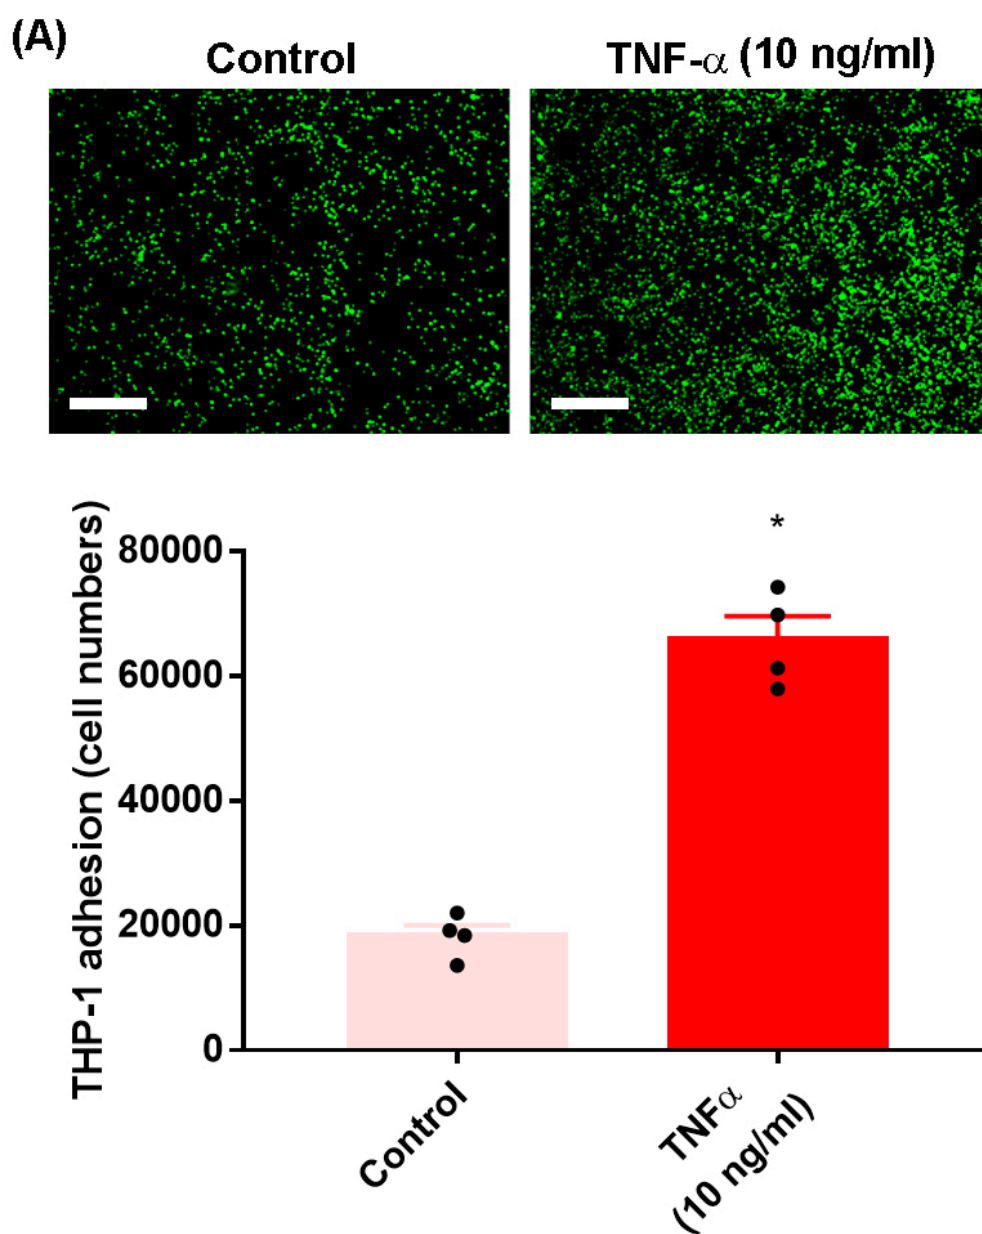

**Figure S3.** Stimulation of OASFs with TNF- $\alpha$  (10 ng/ml) promote monocyte adherence. OASFs were stimulated with TNF- $\alpha$ . Adherent THP-1 cells were photographed and quantified under fluorescence microscopy. Adhesion size bar = 320  $\mu$ m. \*  $p < 0.05$  compared with the control group.

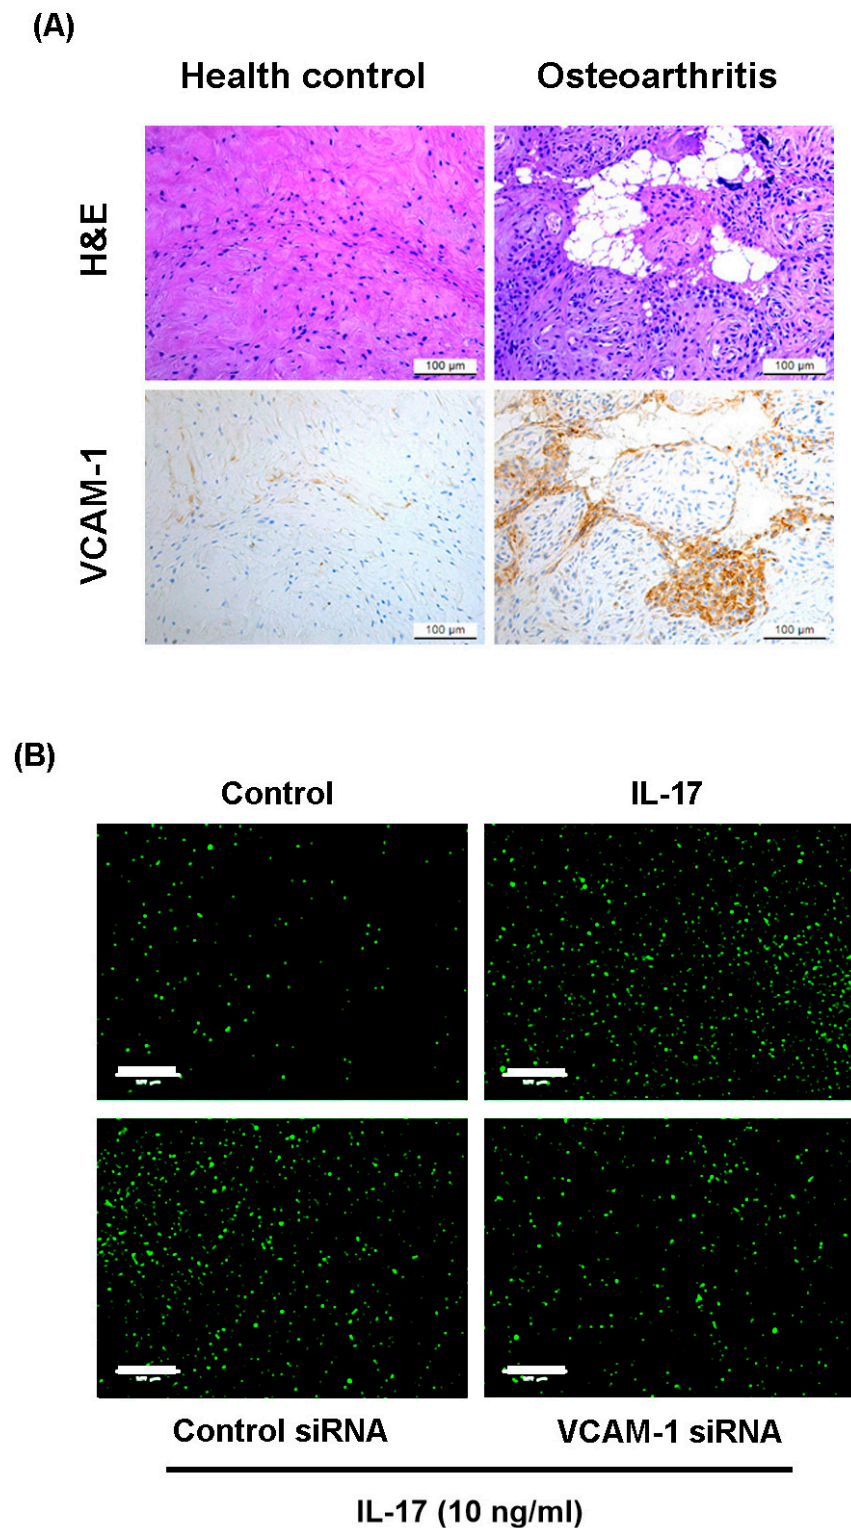

**Figure S4.** IL-17 promotes monocyte adhesion in OASFs through upregulating VCAM-1 production. (A) IHC staining for VCAM-1 in synovium samples from OA patients and healthy individuals. (B) OASFs were transfected with a VCAM-1 siRNA for 24 h and then treated with IL-17 (10 ng/mL). Adherent THP-1 cells were photographed and quantified under fluorescence microscopy. IHC size bar = 100  $\mu$ m. Adhesion size bar = 320  $\mu$ m.

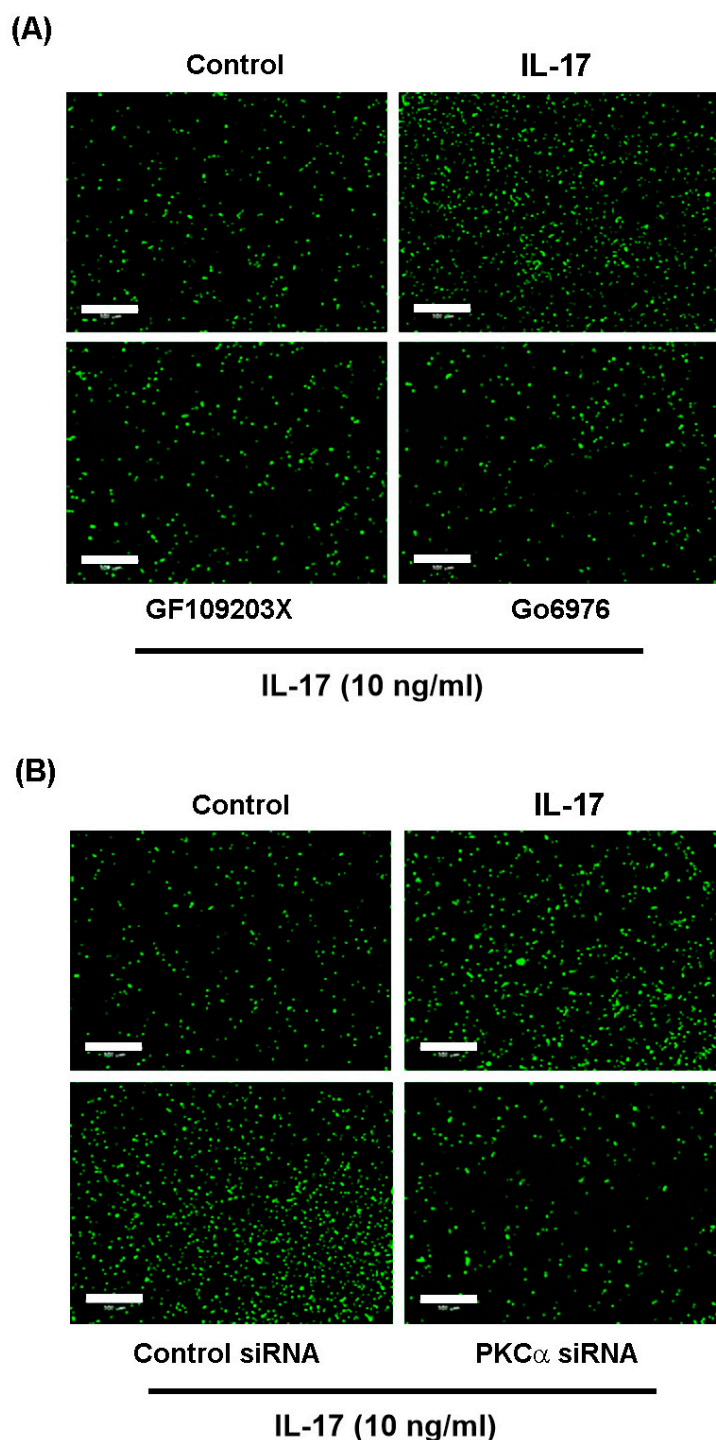

**Figure S5.** The PKC- $\alpha$  pathway mediates IL-17-induced promotion of VCAM-1 synthesis and monocyte adhesion in OASFs. (A&B) OASFs were stimulated with PKC inhibitors (GF109203X, 10 nM and Gö6976, 10 nM) for 30 min or transfected with a PKC- $\alpha$  siRNA for 24 h and then treated with or without IL-17 (10 ng/mL) for 24 h. Adherent THP-1 cells were photographed and quantified under fluorescence microscopy. Adhesion size bar = 320  $\mu$ m.



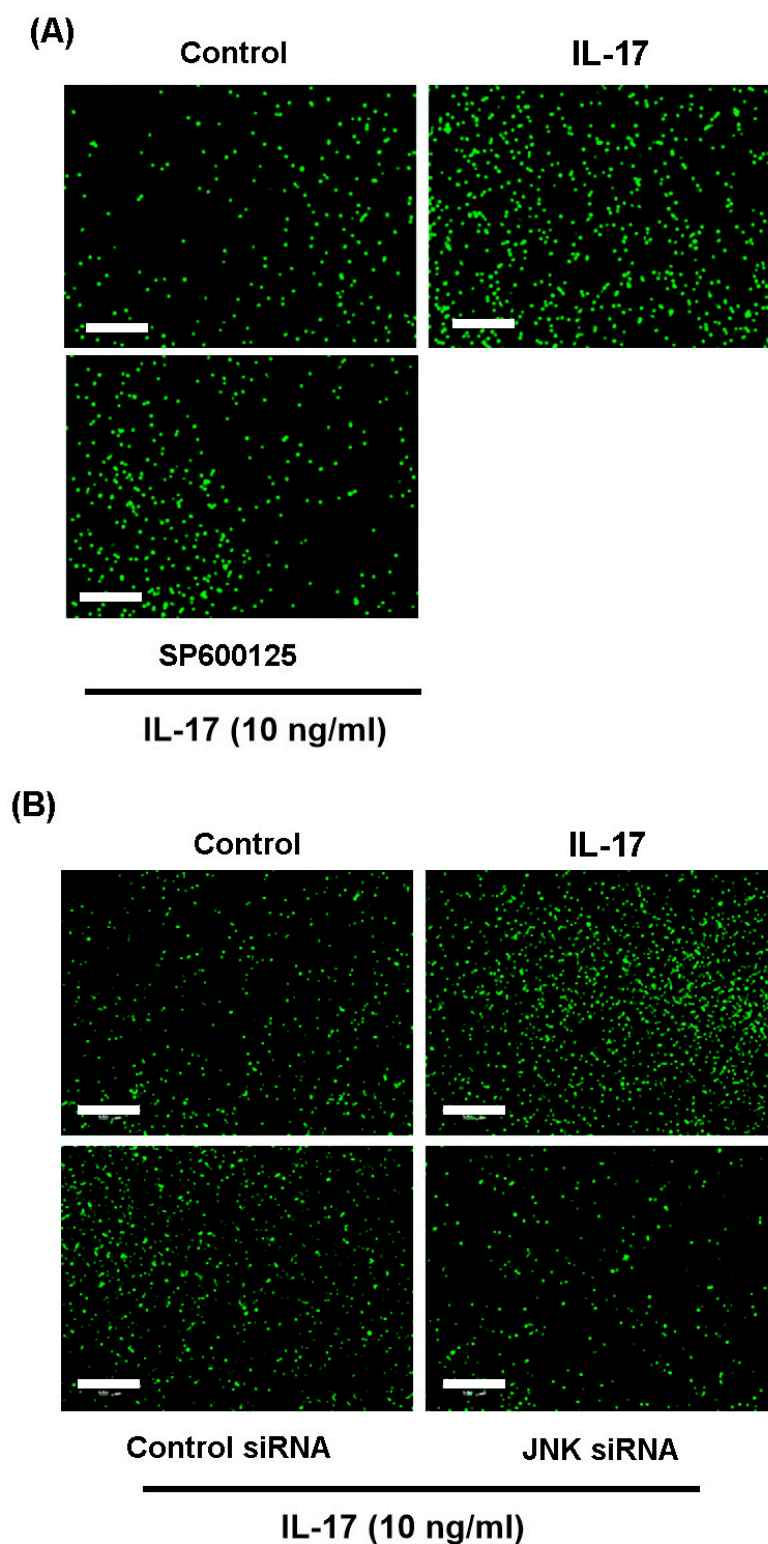

**Figure S6.** The JNK pathway mediates IL-17-induced promotion of VCAM-1 synthesis and monocyte adhesion in OASFs. (A&B) OASFs were stimulated with a JNK inhibitor (SP600125, 10 nM) for 30 min or transfected with a JNK siRNA for 24 h and then treated with IL-17 (10 ng/mL) for 24 h, the adherent THP-1 cells were photographed and quantified under fluorescence microscopy. Adhesion size bar = 320  $\mu$ m.

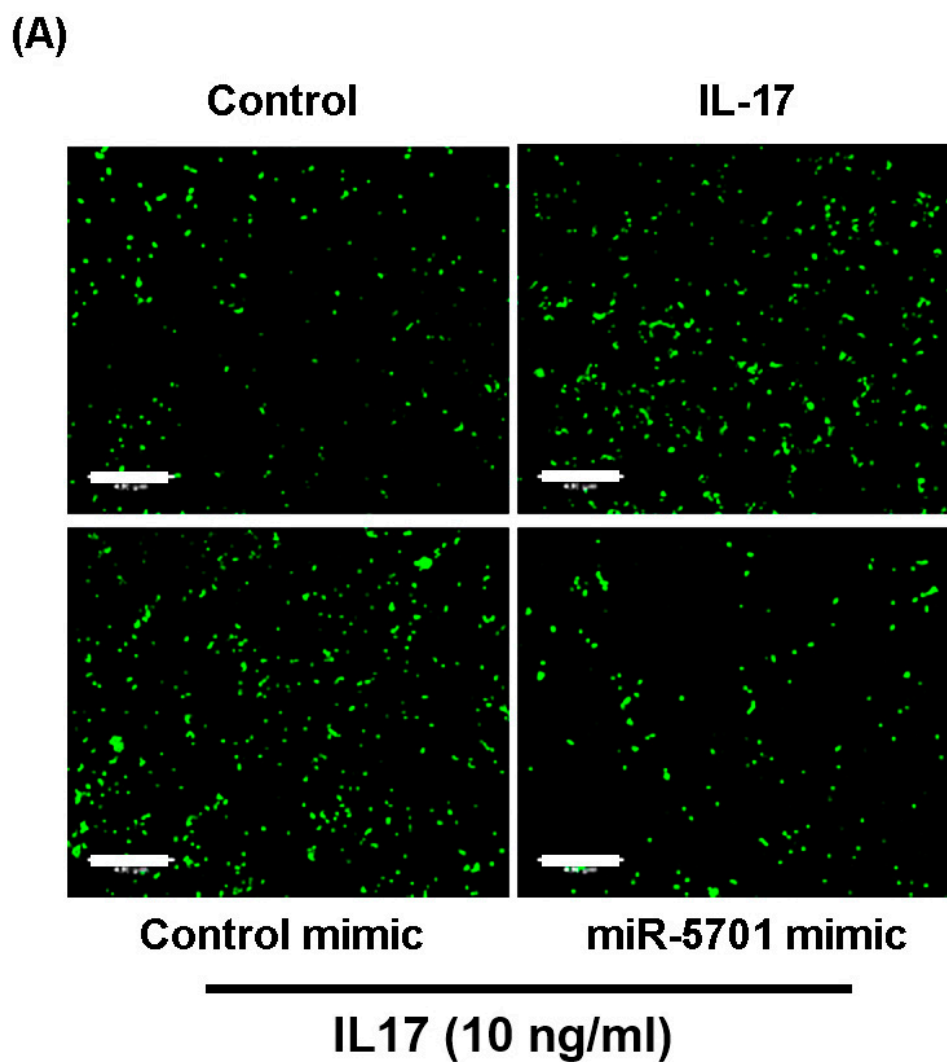

**Figure S7.** IL-17 enhances VCAM-1 production by inhibiting miR-5701 expression. (A) OASFs were transfected with miR-5701 mimic and then treated with IL-17 (10 ng/mL). Adherent THP-1 cells were photographed and quantified under fluorescence microscopy. Adhesion size bar = 320  $\mu\text{m}$ .
